# Supplementary material for: The Spleen Plays No Role in Nephrotoxic Serum Nephritis, but Constitutes a Place of Compensatory Haematopoiesis
Source: PLoS One. 2015 Aug 6;10(8):e0135087. doi: 10.1371/journal.pone.0135087 (PMC4527588; doi:10.1371/journal.pone.0135087)
Supplement: S6 Table — (XLSX) [file pone.0135087.s006.xlsx]

## Sheet: Blatt1
group	haemoglobin (g/dl)
healthy	12.4
healthy	13.1
healthy	11.9
healthy	12
immunized day 14	13.7
immunized day 14	14.3
immunized day 14	12.5
immunized day 14	11.2
Sham day 28	10.5
Sham day 28	10.1
Sham day 28	10.7
Sham day 28	12
SplX day 28	8.7
SplX day 28	9.8
SplX day 28	9.5
SplX day 28	9
