# Supplementary material for: The Spleen Plays No Role in Nephrotoxic Serum Nephritis, but Constitutes a Place of Compensatory Haematopoiesis
Source: PLoS One. 2015 Aug 6;10(8):e0135087. doi: 10.1371/journal.pone.0135087 (PMC4527588; doi:10.1371/journal.pone.0135087)
Supplement: S12 Table — (XLSX) [file pone.0135087.s012.xlsx]

## Sheet: Cxcl12_Spl
Group	tissue	Cq_18s	Mean	SD	Cq_cxcl12	Mean	SD	Delta Cq	Referenz	Ddelta Cq	Ratio
healthy	SPL	14.5113			29.6792
		14.8657	14.6885	0.177236	29.7182	29.6987	0.019495	15.0102	14.538	0.472178	0.720875
healthy	SPL	15.1252			28.9275
		15.155	15.1401	0.0149022	28.9894	28.9585	0.0309236	13.8184		-0.719671	1.64681
healthy	SPL	14.1738			29.2604
		14.4017	14.2877	0.113986	29.1966	29.2285	0.0318647	14.9408		0.402732	0.756424
healthy	SPL	14.5101			29.0217
		14.706	14.608	0.0979618	28.9599	28.9908	0.0309011	14.3828		-0.155239	1.11361
immunized	SPL	14.1175			28.7892
		13.6548	13.8861	0.231334	28.6969	28.743	0.0461066	14.8569		0.318876	0.801694
immunized	SPL	14.23			30.0342
		14.2264	14.2282	0.00179123	30.008	30.0211	0.013078	15.7929		1.25489	0.419025
immunized	SPL	14.2279			28.4746
		14.3756	14.3018	0.0738748	28.5434	28.509	0.0343957	14.2073		-0.330769	1.25768
immunized	SPL	14.23			29.1792
		14.23	14.23	0	29.1383	29.1588	0.0204343	14.9288		0.390736	0.76274
day 7	SPL	14.6			27.1918
		14.6	14.6	0	27.2305	27.2111	0.0193505	12.6111		-1.92689	3.80234
day 7	SPL	14.4157			27.6854
		14.8455	14.6306	0.214915	27.6775	27.6814	0.00396465	13.0508		-1.48718	2.80341
day 7	SPL	13.4109			26.5965
		13.7742	13.5926	0.181669	26.6572	26.6268	0.0303568	13.0343		-1.50376	2.83581
day 7	SPL	13.2808			26.3436
		13.9014	13.5911	0.310309	26.1428	26.2432	0.100385	12.6521		-1.88595	3.69596

## Sheet: Cxcl12_BM
Group	tissue	Cq_HPRT	Mean	SD	Cq_cxcl12	Mean	SD	Delta Cq	Referenz	Ddelta Cq	Ratio
healthy	BM	23.1743			21.5624
		23.1442	23.1592	0.0150656	21.4852	21.5238	0.0386365	-1.63542	-1.49123	-0.144192	1.10511
healthy	BM	24.2529			23.0588
		24.2493	24.2511	0.0017944	22.984	23.0214	0.0373683	-1.22972		0.261513	0.834212
healthy	BM	23.0272			21.4883
		22.6966	22.8619	0.165304	21.5365	21.5124	0.0240911	-1.34955		0.141681	0.906462
healthy	BM	22.9592			21.1464
		22.8014	22.8803	0.0789055	21.1137	21.13	0.016371	-1.75024		-0.259003	1.19665
immunized	BM	23.4014			23.4534
		23.1609	23.2811	0.120256	23.4261	23.4397	0.013641	0.158627		1.64986	0.318671
immunized	BM	22.5763			22.7452
		22.8059	22.6911	0.114769	22.663	22.7041	0.0410788	0.0130036		1.50424	0.352517
immunized	BM	23.3956			23.5269
		23.3541	23.3749	0.0207283	23.4764	23.5017	0.0252347	0.126825		1.61806	0.325774
immunized	BM	23.16			23.004
		23.1382	23.1491	0.0109035	22.8851	22.9445	0.0594411	-0.204538		1.28669	0.409889
day 7	BM	23.1179			23.1706
		23.1472	23.1326	0.0146251	23.0971	23.1338	0.0367264	0.00127505		1.49251	0.355394
day 7	BM	23.4979			23.2904
		23.3401	23.419	0.0788798	23.3289	23.3096	0.0192248	-0.109363		1.38187	0.383721
day 7	BM	23.4037			23.2403
		23.4283	23.416	0.0123006	23.2731	23.2567	0.0164036	-0.159235		1.332	0.397218
day 7	BM	23.3341			23.4364
		23.5901	23.4621	0.128034	23.4026	23.4195	0.0169212	-0.0426197		1.44861	0.366374
